# Supplementary material
Source: PubMed Central journal article supplement (PMC4397935)
Supplement: 10-1055-s-0035-1545885-sup_gf900.pdf [file 10-1055-s-0035-1545885-sup_gf900.pdf]

# Testgüte und Kosten verschiedener Ansätze im pränatalen Screening auf Trisomie 21

## Screening Performance and Costs of Different Strategies in Prenatal Screening for Trisomy 21

## Autoren

K. O. Kagan<sup>1</sup>, M. Schmid<sup>2</sup>, M. Hoopmann<sup>1</sup>, P. Wagner<sup>1</sup>, H. Abele<sup>1</sup>

## Institute

<sup>1</sup> Department of Obstetrics and Gynecology, University of Tübingen, Tübingen<sup>2</sup> Department of Obstetrics and Gynecology, University of Vienna, Vienna, Austria

## Schlüsselwörter

- Ersttrimester-Screenings
- zellfreie fetale DNA
- Trisomie
- Screening

## Key words

- first trimester screening
- cell-free fetal DNA
- trisomy
- screening

## Zusammenfassung

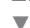

**Zielsetzung:** Durch die Einführung der zellfreien fetalen DNA (cffDNA)-Analyse eröffnen sich derzeit neue Möglichkeiten im pränatalen Screening auf Trisomie 21. Der höheren Testgüte stehen jedoch höhere Kosten gegenüber, sodass durch eine Kombination der verschiedenen Screening-Verfahren die Vorteile der verschiedenen Ansätze nutzbar gemacht werden sollen. In dieser Arbeit sollen die Testgüte und die Kosten der verschiedenen Screening-Ansätze untersucht werden.

**Methoden:** In dieser Arbeit wurden in einer Modellrechnung die Detektions- und Falschpositivrate (DR und FPR) sowie die Kosten unterschiedlicher Ansätze im Screening auf Trisomie 21 und deren Kombinationen verglichen. Das Modell basierte auf den Geburten in Deutschland 2012, die den euploiden Anteil repräsentierten. Der Anteil der Feten mit Trisomie 21 bei 12 + 0 SSW wurde auf der Basis der Altersstruktur des mütterlichen Alters und deren Häufigkeit in der Geburtenkohorte 2012 geschätzt. Berechnet wurde die Testgüte für das Screening anhand des mütterlichen Alters, des Ersttrimester-Screenings, der cffDNA-Analyse sowie den Kombinationen aus mütterlichem Alter und cffDNA und ETS und cffDNA.

**Ergebnisse:** 2012 wurden 673 544 Kinder geboren. Das mediane Alter der Mütter bei Entbindung lag bei 30,2 (25.–75. Quartil 27,0–34,0) Jahren. Entsprechend der mütterlichen Altersstruktur sind daher in der 12 + 0 SSW 1788 Feten mit Trisomie 21 zu erwarten. In Summe beinhaltet die Studienpopulation somit 675 332 Schwangerschaften. Das Screening anhand des mütterlichen Alters und des ETS resultiert in einer DR von 63,3 und 92,2% bei einer FPR von 21,8 und 8,0%. Für die cffDNA-Analyse werden als DR und FPR 99,0 und 0,1% angenommen. Bei der Kombination des mütterlichen Alters und der cffDNA-Analyse wird ab einem mütterlichen Alter eine cffDNA-Analyse durchgeführt. Bei einem Schwellenwert von 30

## Abstract

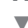

**Objective:** Cell-free fetal DNA (cffDNA) testing has opened new options in prenatal screening for trisomy 21. Due to the higher costs of cffDNA testing there is an ongoing debate on how to combine different screening strategies.

**Methods:** For this study, a model-based approach was used to evaluate all births in Germany in 2012 together with the percentage of euploid and trisomic pregnancies. Detection rates (DR), false positive rates (FPR), the costs of different screening strategies for trisomy 21 and combinations of these strategies were compared. The number of fetuses with trisomy 21 at 12 + 0 weeks of gestation was estimated based on maternal age distribution. We examined the screening performance of a screening strategy based on maternal age, first trimester screening (FTS) and cffDNA testing as well as the combinations "maternal age and cffDNA" and "FTS and cffDNA".

**Results:** In 2012 673 544 children were born. Median maternal age at delivery was 30.2 years (25th–75th quartile: 27.0–34.0). Based on maternal age distribution the expected number of fetuses with trisomy 21 at 12 weeks' gestation was 1788. Our study population therefore consisted of 675 332 pregnancies. Screening based only on maternal age or FTS or cffDNA resulted in detection rates of 63.3%, 92.2% and 99.0% and false positive rates of 21.8%, 8.0% and 0.1%, respectively. When maternal age was combined with cffDNA, cffDNA testing was only offered to women over a certain age; if a cut-off of 30 years was used, this resulted in a DR of 85.2% and a FPR of 1.7%. If primary screening consisted of FTS with cffDNA testing only done when the risk was between 1:10 and 1:1000, the detection rate was 96.7% and the false positive rate was 1.2%.

**Conclusion:** In this model-based study we showed that prenatal screening for trisomy 21 can be improved even more by combining FTS

eingereicht 22. 12. 2014

revidiert 8. 2. 2015

akzeptiert 10. 2. 2015

## Bibliografie

**DOI** <http://dx.doi.org/10.1055/s-0035-1545885>  
Geburtsh Frauenheilk 2015; 75:  
1–7 © Georg Thieme Verlag KG  
Stuttgart · New York ·  
ISSN 0016-5751

## Korrespondenzadresse

**Prof. Dr. Karl Oliver Kagan**  
University of Tübingen  
Department of Obstetrics  
and Gynaecology  
Calwerstraße 7  
72076 Tübingen  
KOKagan@gmx.de

Jahren liegen die DR und FPR bei 85,2 und 1,7%. Bei Verwendung des ETS und im Intermediär-Risikokollektiv cffDNA sind bei Schwellenwerten von 1:10 und 1:1000 eine DR und eine FPR von 96,7 und 1,2% zu erwarten.

**Schlussfolgerung:** In dieser Modellrechnung konnte gezeigt werden, dass v.a. durch die Kombination aus ETS und cffDNA-Analyse das Screening auf Trisomie 21 optimiert werden kann. Nachfolgende Studien sollten untersuchen, ob die positiven Aspekte dieses Kombinationsansatzes auch in der Realität zu beobachten sind.

## Einführung

Das pränatale Screening auf Trisomie 21 ist in den vergangenen Jahrzehnten ständig weiterentwickelt worden. Dabei ist v.a. das kombinierte Ersttrimester-Screening (ETS) zu nennen, das mittlerweile in vielen Ländern Teil der Schwangerenvorsorge geworden ist und das in den vergangenen Jahren um die Möglichkeit der Risikostratifizierung zahlreicher Schwangerschaftskomplikationen erweitert wurde [1,2].

Mit der Einführung des ETS konnte trotz des ständig steigenden Altersdurchschnitts der Schwangeren die Rate der invasiven diagnostischen Maßnahmen (CVS und Amniozentese) signifikant abgesenkt werden. Dies wurde v.a. in England und Dänemark gezeigt. So wiesen Morgan et al. nach, dass in England die Screen-Positiv-Rate nach Umstellung des Screening-Konzepts, welches zunächst auf einem biochemischen Screening im 2. Trimenon basierte, von 6 auf 3,1% abfiel [3]. Analog berichteten Ekkelund et al., dass nach flächenhafter Einführung des ETS in Dänemark eine Falschpositivrate von 3,3% erreicht werden konnte [4]. Demgegenüber stehen veraltete Screening-Programme, die nur auf dem mütterlichen Alter basieren und bei einem Schwellenwert von 35 Jahren mit einer Falschpositivrate von etwa 20% vergesellschaftet sind.

Durch die Einführung der zellfreien fetalen DNA (cffDNA)-Analyse eröffnen sich derzeit neue Möglichkeiten im Screening auf Trisomie 21 [5,6]. Die Detektions- und Falschpositivraten liegen bei 99 und 0,1% [7], es gibt vonseiten des durchführenden Arztes kaum Fehlerquellen und bis auf eine Qualifizierung für Aufklärung und Beratung im Sinne des Gendiagnostikgesetzes sind keine zusätzlichen Voraussetzungen erforderlich. Problematisch ist jedoch, dass das Screening nur auf die häufigsten Chromosomenstörungen fokussiert, dass in einem Teil der Schwangerschaften mangels ausreichender cffDNA im maternalen Blut die Untersuchung ergebnislos bleibt, dass dichoriale Mehrlinge und insbesondere Vanishing-Twin-Situationen die Testgüte absenken und dass diese Form des Screenings schlussendlich deutlich teurer ist als die bisherigen Verfahren.

Insofern stellt sich die Frage, wie eine Kombination der unterschiedlichen Screening-Untersuchungen in Deutschland umgesetzt werden könnte, um die Vorteile der bisherigen Verfahren nicht zu verlieren und trotz allem die Qualität des Screenings weiter zu steigern. Dabei müssen auch gesundheitsökonomische Auswirkungen bei der Einführung entsprechender Screening-Algorithmen Berücksichtigung finden.

and cffDNA. Further studies are necessary to examine whether these results can be reproduced in reality.

## Methoden

In einer Modellrechnung wurden in dieser Arbeit die Detektions- und Falschpositivrate sowie die Kosten unterschiedlicher Ansätze im Screening auf Trisomie 21 und deren Kombinationen verglichen. Dazu wurde zunächst ein Modell einer Studienpopulation ermittelt, das aus euploiden und Trisomie-21-Schwangerschaften bestand. Anschließend wurde die veröffentlichte Testgüte der unterschiedlichen Screening-Ansätze verwendet, um die Detektions- und Falschpositivrate in der Studienpopulation zu ermitteln.

## Studienpopulation

Als Studienpopulation wurden die Geburten in Deutschland 2012 und die Altersstruktur der Mütter verwendet [8]. Dabei wurde angenommen, dass es sich hierbei nur um euploide Schwangerschaften handelte. Um die Anzahl der Feten mit Trisomie 21 bei 12+ SSW abzuschätzen, wurde auf der Basis des mütterlichen Alters und deren Häufigkeit in der Geburtenkohorte 2012 die Anzahl der erwarteten Schwangerschaften mit Trisomie 21 in der 12+0 SSW für jedes mütterliche Alter zwischen dem 15. und 50. Lebensjahr berechnet und summiert [8–10].

Im Einzelnen wurde für jedes mütterliche Lebensjahr durch Multiplikation des mütterlichen Altersrisikos mit der Anzahl der Lebensgeburten am Termin die Anzahl der Feten mit Trisomie 21 am Termin berechnet. Aufgrund der erhöhten Fehlgeburtsrate von Feten mit Trisomie 21 wurde die Anzahl am Termin mit einem Anpassungsfaktor für die 12+0 SSW multipliziert. Die Gesamtzahl der zu erwartenden Feten mit Trisomie 21 in der 12+0 SSW ergab sich aus der Summe der pro mütterliches Lebensjahr berechneten Fälle.

Das Risiko einer Trisomie 21 am Termin beträgt:

$$\text{Risiko} = 0,000627 + e^{-16,2395 + 0,286 \times (\text{mat. Alter} - 0,5)} \times 1,5$$

Der Anpassungsfaktor für die 12+0 SSW lautet:

$$\text{adj} = 10^{0,9425 - 1,023 \times \text{LOG}_{10}(12) + 0,2718 \times \text{LOG}_{10}(12) \times \text{LOG}_{10}(12)}$$

und

$$\text{Risiko}_{12\text{SSW}} = \text{Risiko} \times \text{adj}$$

## Testgüte und Kosten der einzelnen Screening-Verfahren

Die Testgüte des Screenings anhand des *mütterlichen Alters* ergab sich aus der Altersstruktur der Studienpopulation. Bei einem mütterlichen Alter oberhalb eines Schwellenwerts galt die Schwangerschaft als screen-positiv.

Für das Screening anhand der *cffDNA* wurde eine Detektions- und Falschpositivrate von 99 und 0,1% zugrunde gelegt [7]. Auffällige cffDNA-Ergebnisse galten als screen-positiv. Bei einer ergebnislosen cffDNA-Analyse, die in 3% der Untersuchungen erwartet wurde, galt die Schwangerschaft ebenfalls als screen-positiv. Es wurde vorausgesetzt, dass die Häufigkeit ergebnisloser Unter-

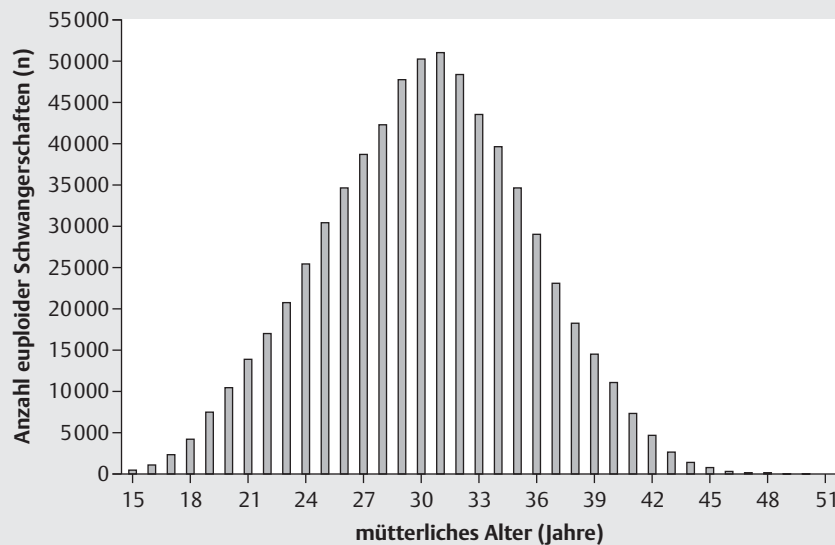

**Abb. 1** Mütterliche Altersstruktur bei Entbindung euploider Kinder in Deutschland 2012.

suchungen in der euploiden und Trisomie-21-Gruppe gleich verteilt ist [5].

Beim *kombinierten ETS* wurde angenommen, dass die Verteilung der Risiken in der Studienpopulation der der Referenzpopulation entsprach (● **Tab. 1**) [1]. Bei einem Risiko oberhalb eines entsprechenden Schwellenwerts galt die Schwangerschaft als screen-positiv.

Bei der kombinierten Anwendung der Screening-Verfahren erfolgte zunächst ein primäres Screening anhand des mütterlichen Alters oder des ETS. In einem Subkollektiv – definiert durch das primäre Screening – wurde die cffDNA-Analyse als 2. Screening-Test angeboten. Die Testgüte der einzelnen Screening-Tests ergab sich aus den obigen Ausführungen.

Es wurde postuliert, dass alle screen-positiven Schwangerschaften mittels invasiver Diagnostik weiter abgeklärt werden, und dass die Detektions- und Falschpositivrate der invasiven Testverfahren bei 100 und 0% liegt.

Für das ETS und die invasive Diagnostik wurden als Kosten €150 und €1000 veranschlagt. Das Screening anhand des mütterlichen Alters war kostenfrei und für die cffDNA-Analyse wurden Kosten in Höhe von €500 angesetzt. Im Einzelfall wurden zudem die Kosten bei einem Preis von €250 für die cffDNA-Analyse berechnet.

## Ergebnisse

Dem Bericht des Statistischen Bundesamts nach wurden 2012 673 544 Kinder geboren. Das mediane Alter der Mütter bei Entbindung lag bei 30,2 (25.–75. Quartil 27,0–34,0) Jahren (● **Abb. 1**). Entsprechend der mütterlichen Altersstruktur sind daher am Termin 1333 Feten und bei 12 + 0 SSW 1788 Feten mit Trisomie 21 zu erwarten (● **Abb. 2**). Insgesamt beinhaltete die Studienpopulation somit 675 332 Schwangerschaften.

### Screening anhand des mütterlichen Alters

● **Tab. 2** beschreibt die Detektions- und Falschpositivrate sowie die Kosten im Screening auf Trisomie 21 anhand des mütterlichen Alters für verschiedene Schwellenwerte an. Der meist verwendete Schwellenwert von 35 Jahren führt zu einer Erkennungs-

**Tab. 1** Verteilung der Risiken nach kombiniertem ETS bei euploiden Schwangerschaften und bei Feten mit Trisomie 21.

| Risiko           | euploid     | Trisomie 21 |
|------------------|-------------|-------------|
| $\geq 1:10$      | 0,6%        | 69,1%       |
| 1:11–1:50        | 1,6%        | 15,2%       |
| 1:51–1:100       | 1,7%        | 4,1%        |
| 1:100–1:250      | 4,1%        | 3,8%        |
| 1:251–1:1000     | 13,1%       | 4,8%        |
| 1:1001–1:5000    | 29,6%       | 2,5%        |
| $\leq 1:5001$    | 49,4%       | 0,5%        |
| <b>insgesamt</b> | <b>100%</b> | <b>100%</b> |

ungsrate von 63,3% und einer Falschpositivrate von 21,8%. Die Kosten für ein entsprechendes Screening-Verfahren, die sich auf die Kosten für die invasive Diagnostik beschränken, liegen bei €148 267 000 bzw. €219,55 pro Schwangerschaft.

### Screening anhand des ETS

Im Screening auf Trisomie 21 anhand des ETS mit einem Schwellenwert von 1:250 werden 92,2% der Fälle mit Trisomie 21 erkannt bei einer Falschpositivrate von 8,0%. Die Kosten belaufen sich bei diesem Schwellenwert auf €156 832 800 bzw. €232,23 pro Schwangerschaft. In ● **Tab. 3** sind die Ergebnisse bei Verwendung anderer Schwellenwerte zusammengefasst.

### Screening anhand der cffDNA

Bei Verwendung der cffDNA-Analyse liegt die Detektions- und Falschpositivrate bei 99 und 0,1%. Unter Berücksichtigung einer 3%igen Versagerquote mit anschließender invasiver Abklärung liegt die gesamte Falschpositivrate bei 3,1% ( $n = 20859$ ) bei unveränderter Detektionsrate von 99,0% ( $n = 1770$ ). Die Kosten eines entsprechenden Screening-Ansatzes belaufen sich €360 295 000 bzw. €533,51 pro Schwangerschaft, wenn für die cffDNA-Analyse €500 angesetzt werden und €191 462 000 bzw. €283,51 wenn sich die Kosten auf €250 beschränken ( $675\,332 \times €500$  oder €250 für die cffDNA-Analyse plus €1000  $\times 22\,629$  für die invasive Diagnostik).

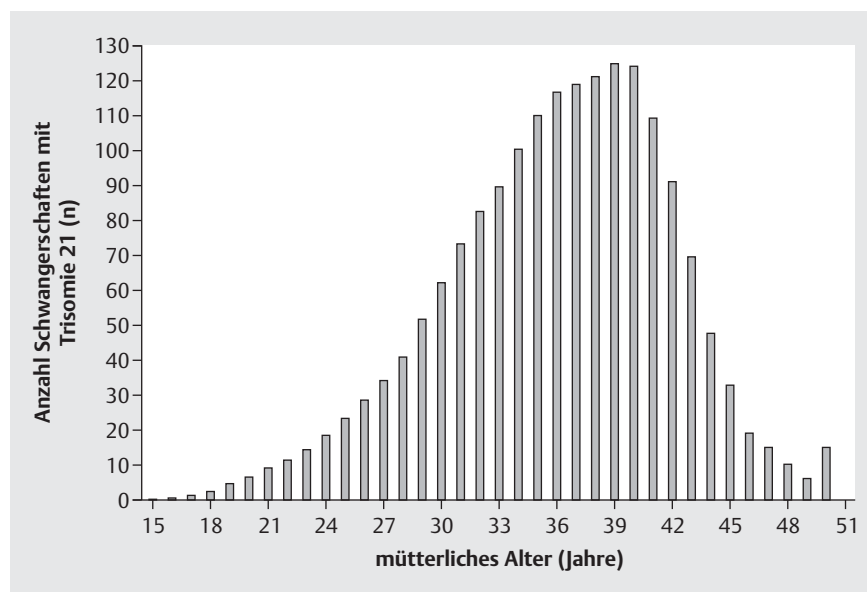

**Abb. 2** Geschätzte mütterliche Altersstruktur bei Entbindung von Kindern mit Trisomie 21 in Deutschland 2012.

**Tab. 2** Testgüte und Kosten im Screening auf Trisomie 21 anhand des mütterlichen Alters.

| Cut-off (Jahre) | Detektionsrate<br>n = 1 788 |      | Falschpositivrate<br>n = 673 544 |      | Kosten (€)  |
|-----------------|-----------------------------|------|----------------------------------|------|-------------|
|                 | n                           | %    | n                                | %    |             |
| 25              | 1 716                       | 96,0 | 570 683                          | 84,7 | 572 399 000 |
| 30              | 1 538                       | 86,0 | 378 181                          | 56,1 | 379 719 000 |
| 35              | 1 131                       | 63,3 | 147 136                          | 21,8 | 148 267 000 |
| 40              | 541                         | 30,3 | 28 455                           | 4,2  | 28 996 000  |

Die Kosten ergeben sich aus dem Alters-Screening plus der invasiven Diagnostik:

Alters-Screening: 675 332 Schwangerschaften × €0 plus

invasive Diagnostik: Anzahl screen-positive Fälle × €1 000

**Tab. 3** Testgüte und Kosten im Screening auf Trisomie 21 anhand des ETS.

| Cut-off (Risiko) | Detektionsrate<br>n = 1 788 |      | Falschpositivrate<br>n = 673 544 |      | Kosten (€)  |
|------------------|-----------------------------|------|----------------------------------|------|-------------|
|                  | n                           | %    | n                                | %    |             |
| 1:50             | 1 507                       | 84,3 | 14 818                           | 2,2  | 117 624 800 |
| 1:100            | 1 581                       | 88,4 | 26 268                           | 3,9  | 129 148 800 |
| 1:250            | 1 649                       | 92,2 | 53 884                           | 8,0  | 156 832 800 |
| 1:1 000          | 1 779                       | 99,5 | 341 487                          | 50,7 | 444 565 800 |

Die Kosten ergeben sich aus dem ETS plus der invasiven Diagnostik:

ETS: 675 332 Schwangerschaften × €150 plus

invasive Diagnostik: Anzahl screen-positive Fälle × €1 000

### Screening anhand des mütterlichen Alters und der cffDNA

Das Screening basiert hierbei zunächst auf dem mütterlichen Alter. Bei Überschreiten eines Schwellenwerts erfolgt zunächst eine weitere Abklärung mittels cffDNA-Analyse. Sollte diese auffällig oder ergebnislos sein, gilt die Schwangerschaft als screen-positiv und wird invasiv abgeklärt.

Bei einem Schwellenwert von 30 Jahren werden 86,0% (n = 1538) der Feten mit Trisomie 21 und 56,1% (n = 378 181) der euploiden Schwangerschaften zunächst mittels cffDNA-Analyse weiter abgeklärt (● **Tab. 2**). Die gesamte Detektions- und Falschpositivrate beträgt schlussendlich 85,2 und 1,7%. Die Kosten liegen bei

€203 094 500 bzw. €300,73 pro Schwangerschaft bei €500 pro cffDNA-Analyse und bei €108 164 750 bzw. €160,17 pro Schwangerschaft bei €250 pro cffDNA-Analyse. ● **Tab. 4** zeigt die Testgüte bei Verwendung anderer Schwellenwerte.

### Screening anhand des ETS und der cffDNA

Bei diesem Ansatz wird zunächst ein ETS mit 2 Schwellenwerten durchgeführt, die das Hoch- und Niedrigisiko definieren. Im Intermediärrisikobereich erfolgt eine weitere Untersuchung mittels cffDNA-Analyse. Patientinnen im Hochrisikobereich nach ETS sowie einer auffälligen oder ergebnislosen cffDNA-Analyse

**Tab. 4** Testgüte und Kosten im Screening anhand des mütterlichen Alters und der cffDNA bei Überschreiten eines Schwellenwerts.

| Cut-off (Risiko) | Detektionsrate<br>n = 1 788 |      | Falschpositivrate<br>n = 673 544 |     | Kosten (€)  |
|------------------|-----------------------------|------|----------------------------------|-----|-------------|
|                  | n                           | %    | n                                | %   |             |
| 25               | 1 699                       | 95,0 | 17 674                           | 2,6 | 305 572 500 |
| 30               | 1 523                       | 85,2 | 11 712                           | 1,7 | 203 094 500 |
| 35               | 1 120                       | 62,6 | 4 557                            | 0,7 | 79 810 500  |
| 40               | 536                         | 30,0 | 882                              | 0,1 | 15 916 000  |

Die Kosten ergeben sich aus dem Alters-Screening, der cffDNA-Analyse plus der invasiven Diagnostik:

Alters-Screening: 675 332 Schwangerschaften × €0 plus

cffDNA-Analyse: Schwangerschaften bei Patientinnen mit einem mütterlichen Alter oberhalb eines Schwellenwerts × €500 plus

invasive Diagnostik: screen-positive Fälle × €1 000

**Tab. 5** Anteil der euploiden und Trisomie-21-Schwangerschaften mit einem hohen/intermediären und niedrigen Risiko nach ETS.

| Häufigkeitsverteilung von euploiden und Trisomie 21 nach ETS (%) |         | Schwellenwert zur Definition des Hochrisikokollektivs |                       |                       |                       |                       |                       |
|------------------------------------------------------------------|---------|-------------------------------------------------------|-----------------------|-----------------------|-----------------------|-----------------------|-----------------------|
|                                                                  |         | 1:10                                                  |                       | 1:50                  |                       | 1:100                 |                       |
|                                                                  |         | Trisomie 21                                           | euploid               | Trisomie 21           | euploid               | Trisomie 21           | euploid               |
| Schwellenwert zur Definition des Niedrigrisikokollektivs         | 1:1 000 | 69,1/<br>27,9/<br>3,0                                 | 0,6/<br>20,4/<br>79,0 | 84,3/<br>12,7/<br>3,0 | 2,2/<br>18,8/<br>79,0 | 88,4/<br>8,6/<br>3,0  | 3,9/<br>17,1/<br>79,0 |
|                                                                  | 1:5 000 | 69,1/<br>30,4/<br>0,5                                 | 0,6/<br>50,0/<br>49,4 | 84,3/<br>15,2/<br>0,5 | 2,2/<br>48,4/<br>49,4 | 88,4/<br>11,1/<br>0,5 | 3,9/<br>46,7/<br>49,4 |

**Tab. 6** Testgüte und Kosten im Screening auf Trisomie 21 anhand des ETS gefolgt von einer cffDNA-Analyse im Intermediärrisikobereich.

| Falschpositivrate (n,%)<br>Detektionsrate (n,%)<br>Kosten (€) |         | Schwellenwert zur Definition des Hochrisikokollektivs |                                             |                                             |
|---------------------------------------------------------------|---------|-------------------------------------------------------|---------------------------------------------|---------------------------------------------|
|                                                               |         | 1:10                                                  | 1:50                                        | 1:100                                       |
| Schwellenwert zur Definition des Niedrigrisikokollektivs      | 1:1 000 | 8 296 (1,2)<br>1 729 (96,7)<br>180 275 800            | 18 740 (2,8)<br>1 732 (96,9)<br>185 198 300 | 29 835 (4,4)<br>1 733 (96,9)<br>190 532 800 |
|                                                               | 1:5 000 | 14 471 (2,1)<br>1 773 (99,2)<br>286 201 800           | 24 914 (3,7)<br>1 776 (99,3)<br>291 123 300 | 36 009 (5,3)<br>1 777 (99,4)<br>296 457 300 |

Die Kosten ergeben sich aus dem ETS, der cffDNA-Analyse und der invasiven Diagnostik:

ETS: 675 332 Schwangerschaften × €150 plus

cffDNA: Anzahl Schwangerschaften im Intermediärrisikobereich × €500 plus

invasive Diagnostik: Anzahl screen-positive Fälle × €1 000

gelten als screen-positiv und werden mittels invasiver Diagnostik abgeklärt.

Die Häufigkeitsverteilung für die entsprechenden Risikoklassen ist in **Tab. 5** dargestellt. Bei Verwendung der Schwellenwerte 1:10 und 1:1000 sind 0,6, 20,4 und 79,0% der euploiden Schwangerschaften in der Hoch-, Intermediär- und Niedrigrisikogruppe zu finden. Die entsprechende Verteilung bei Feten mit Trisomie 21 beträgt 69,1, 27,9 und 3,0%. Bei Verwendung dieser Schwellenwerte liegt die gesamte Detektions- und Falschpositivrate bei 96,7% (n = 1,729) und 1,2% (n = 8296). Die Kosten belaufen sich auf €180 275 800 bzw. €266,94 pro Schwangerschaft oder €145 800 300 bzw. €215,89 pro Schwangerschaft je nachdem ob die cffDNA-Analyse mit €500 oder €250 verbucht wird. In **Tab. 6** sind die Testgüte und die Kosten für die verschiedenen Schwellenwerte angegeben.

## Diskussion

In dieser Arbeit konnte an einer Modellrechnung gezeigt werden, dass nur durch eine primäre cffDNA-Analyse oder eine Kombination der cffDNA-Analyse mit anderen Screening-Verfahren die Detektionsrate für Trisomie 21 auf über 95% gesteigert und gleichzeitig die Falschpositivrate unter 3% reduziert werden kann. Bei Fokussierung auf die Testgüte scheint die Kombination aus ETS und cffDNA-Analyse mit einer Detektions- und Falschpositivrate von 96,7 und 1,2% am sinnvollsten. Dies ist auch günstiger als das primäre Screening mittels cffDNA-Analyse, da bei diesem Ansatz die Falschpositivrate aufgrund ergebnisloser cffDNA-Auswertungen bei 3,1% liegt. Auch in der Kombination zwischen mütterlichem Alter und cffDNA kann keine äquivalente Testgüte erreicht werden. Sollte eine Detektionsrate über 95%

angestrebt werden, müsste ab einem mütterlichen Alter von 25 Jahren eine cffDNA-Analyse angeboten werden. Dadurch müsste bei 85% der Bevölkerung eine zusätzliche cffDNA-Analyse durchgeführt werden, wodurch die Kosten im Vergleich zum ETS oder zum klassischen Alters-Screening etwa verdoppelt würden.

Bei Fokussierung auf die Kosten ist das primäre Screening mittels cffDNA bei Kosten von €500 pro Untersuchung mit etwa €530 pro Schwangerschaft am teuersten. Durch die Kombination mit dem ETS mit Schwellenwerten von 1:10 und 1:1000 könnten die Kosten bei einer Detektionsrate von über 96% auf etwa die Hälfte gesenkt werden.

Eine weitere relevante Kostensenkung ist durch die Reduktion der cffDNA-Kosten auf €250 erreichbar. Die Kosten für den Kombinationsansatz aus ETS und cffDNA-Analyse lägen dann bei etwa €215, das primäre Screening mittels cffDNA-Analyse bei €280 pro Schwangerschaft.

Der Anteil ergebnisloser Untersuchungen ist neben dem eigentlichen Preis der cffDNA-Analyse von maßgeblicher Relevanz für die Gesamtkosten, da in der Regel konsekutiv eine invasive Diagnostik durchgeführt wird, die bis zu 4-mal teurer ist als die cffDNA-Analysen. Durch die tatsächlichen falsch positiven Ergebnisse und die Testversager ergibt sich eine invasive Abklärungsrate von über 3%, wodurch der Vorteil der cffDNA-Diagnostik wieder infrage gestellt wird. Durch erneute Blutabnahmen und eine Re-Analyse kann die Versagerquote allerdings auf etwa 1–2% gesenkt werden, was eine weitere maßgebliche Reduktion der Gesamtkosten zur Folge hat [11].

Unsere Ergebnisse sind mit denen vorangegangener Studien vergleichbar. Cuckle et al. verwendeten ebenfalls einen modellbasierten Ansatz, um die Kosten unterschiedlicher Screening-Methoden (ETS, cffDNA und die Kombination beider Methoden) einzuschätzen [12]. Als Kosten für ein ETS veranschlagten die Autoren \$150 für das ETS und für die invasive Diagnostik \$1000. Für die cffDNA-Analyse wurden \$500, \$1000, \$1500 und \$2000 zugrunde gelegt. Sie schlussfolgerten, dass die cffDNA-Analyse im Screening auf Trisomie 21 den Hauptteil der Kosten verursachen würde, und dass die cffDNA-Analyse nur dann für staatliche Gesundheitssysteme interessant wäre, wenn die Kosten deutlich sinken würden. Bis dahin empfehlen die Autoren ein 2-Stufen-Modell mit ETS und cffDNA-Analyse für eine Subpopulation.

Morris et al. verfolgten einen ähnlichen Ansatz und untersuchten die Kosten des ETS, der cffDNA-Analyse, Kombinationen beider Ansätze und der invasiven Diagnostik an einer Modellrechnung mit 10000 Patientinnen. Im Gegensatz zu den hier vorgestellten 2-Stufen-Modellen mit der cffDNA-Analyse im intermediären Kollektiv, nahmen die Autoren an, dass die cffDNA-Analyse bei einem ETS-Risiko über 1:150 zum Einsatz kommen sollte. Ein Hochrisikobereich, in dem direkt eine invasive Diagnostik empfohlen wird, wurde nicht definiert. Sie schlussfolgerten – wie auch Cuckle et al. – dass die alleinige Anwendung der cffDNA-Analyse bei einem weiteren Preisverfall aufgrund der Reduktion der invasiven Diagnostik für staatliche Gesundheitssysteme interessant werden könnte. Bis dahin wird ebenfalls ein 2-Stufen-Modell empfohlen [13].

Beulen et al. diskutierten, ob sich die cffDNA-Analyse im Risikokollektiv oder im generellen Screening auf Trisomie 21 in den Niederlanden etablieren könnte und befanden, dass sich der Test bei der derzeitigen Kostenstruktur nur als sekundärer Test eignet [14].

Song et al. verglichen an einem Modell das ETS mit dem integrierten Screening und der cffDNA-Analyse bei Hochrisikoergebnissen anderer Screening-Tests oder bei Frauen, die 35 Jahren oder älter

waren. Die Autoren schlossen, dass durch die verbesserte Testgüte die cffDNA-Analyse den anderen Tests vorzuziehen sei [15]. Unsere Arbeit basiert auf einigen Annahmen, die bei der Beurteilung berücksichtigt werden müssen:

- ▶ Etwa 10% der Patientinnen in Deutschland sind privat versichert. In diesem Kollektiv ist eine höhere Vergütung der ärztlichen Untersuchungen zu erwarten.
- ▶ Die Modellrechnung geht davon aus, dass alle Schwangeren ein Screening auf Trisomien in Anspruch nehmen werden. Tatsächlich lehnt aber ein Teil der Schwangeren jegliche genetische Screening-Untersuchungen in der Schwangerschaft ab. Belastbare Studiendaten stehen nicht zur Verfügung. Grundsätzlich ist davon auszugehen, dass die Uptake-Rate der cffDNA-Analyse höher sein wird als die des ETS oder des Alters-Screenings. Dies ist auf die Simplizität des Tests (Blutabnahme), auf die hervorragende Testgüte und auf die einfachere Interpretation der Testergebnisse zurückzuführen.
- ▶ Die Kombination aus ETS und cffDNA kann nur dann die aufgezeigte Qualität erreichen, wenn der primäre Screening-Test – also das ETS – die in den Studien angegebene Detektions- und Falschpositivrate von 90 und 5% aufweist. In einer Arbeit von Lüthgens et al. wurde bei mehr als 38000 Schwangerschaften gezeigt, dass die Detektionsrate in Deutschland etwa 10% niedriger war als erwartet, wodurch auch die gesamte Testgüte hinter den Erwartungen zurückfällt [16].
- ▶ In der vorliegenden Auswertung wurden nur die Kosten für das Screening an sich berücksichtigt, was sich aus der Summe der Screening-Untersuchungen und der invasiven Diagnostik zusammensetzt. Für eine umfassende Kostenbeurteilung müssten auch die zusätzlichen Kosten eines frühen und späten Schwangerschaftsabbruchs, die direkten medizinischen Kosten, die im Laufe des Lebens von Menschen mit Trisomie 21 entstehen und die indirekten Kosten, die durch den möglichen Ausfall der Arbeitsfähigkeit eines Elternteils bedingt durch die intensivere Betreuung eines Kindes mit Trisomie 21, berücksichtigt werden. Da in diesem Rahmen Leben direkt gegen Geld aufgewogen würde, wurde dieser Aspekt aus ethisch-moralischen Gründen nicht weiterverfolgt.

Grundsätzlich stellt sich die Frage, warum bei der Kombination aus ETS und cffDNA-Analyse nur die Gruppe mit einem intermittierendem Risiko und nicht alle ab einem gewissen Schwellenwert von einer cffDNA-Analyse profitieren. Dahingehend ist zu betonen, dass die Trisomie 21 nur ca. 50% der möglichen Chromosomendefekte ausmacht und dass die verbleibenden Chromosomenstörungen ebenfalls häufig mit einem niedrigen PAPP-A und einer hohen Nackentransparenz einhergehen. Diese Marker führen aber dazu, dass auch das Risiko für Trisomie 21 ansteigt [17]. Insofern ist unter Berücksichtigung anderer Chromosomenstörungen, die ggf. nicht von der cffDNA-Analyse erkannt werden, im Hochrisikokollektiv die invasive Diagnostik der cffDNA-Analyse vorzuziehen. In einer Arbeit mit etwa 21000 ETS-Untersuchungen wurde gezeigt, dass von 212 Chromosomenstörungen 23 (10,9%) nicht durch eine cffDNA-Auswertung erkannt worden wären. Diese hatten in 70% der Fälle ein Risiko über 1:50 nach der ETS-Untersuchung [18]. Zudem haben in einem Risikokollektiv mit einem ETS-Risiko über 1:10, was etwa 1% der Bevölkerung betrifft, die Hälfte eine Trisomie 21, sodass aus Gründen der Kosten- und Zeiteffektivität eine direkte Karyotypisierung in diesem Kollektiv lohnt [1].

## Zusammenfassung

▼  
In dieser Modellrechnung konnte gezeigt werden, dass in der gegenwärtigen Kostenstruktur v.a. durch die Kombination aus ETS und cffDNA-Analyse das Screening auf Chromosomenstörungen optimiert und gleichzeitig die Kosten im Vergleich zu einem primären Screening-Ansatz mittels cffDNA-Analyse auf ein vernünftiges Maß reduziert werden kann. Nachfolgende Studien sollten untersuchen, ob die positiven Aspekte dieses Kombinationsansatzes auch in der Realität zu beobachten sind. Abschließend sei betont, dass eine zeitgemäße pränatale Betreuung im 1. Trimenon nicht nur die Aneuploidie-Diagnostik fokussiert, sondern ein Screening auf fetale Fehlbildungen und schwerwiegende – teils behandelbare – Schwangerschaftskomplikationen beinhaltet, um die Betreuung zu individualisieren und optimieren [2].

## Danksagung

▼  
Diese Arbeit ist mit Unterstützung der Arbeitsgemeinschaft Materno-fetale Medizin entstanden.

## Interessenkonflikt

▼  
Maximilian Schmid ist Berater der Firma Ariosa Diagnostics, Hersteller des Harmony® Pränatal Test.

## Literatur

- 1 Kagan KO, Wright D, Baker A et al. Screening for trisomy 21 by maternal age, fetal nuchal translucency thickness, free beta-human chorionic gonadotropin and pregnancy-associated plasma protein-A. *Ultrasound Obstet Gynecol* 2008; 31: 618–624
- 2 Nicolaides KH. A model for a new pyramid of prenatal care based on the 11 to 13 weeks' assessment. *Prenat Diagn* 2011; 31: 3–6
- 3 Morgan S, Delbarre A, Ward P. Impact of introducing a national policy for prenatal Down syndrome screening on the diagnostic invasive procedure rate in England. *Ultrasound Obstet Gynecol* 2013; 41: 526–529
- 4 Ekelund CK, Jørgensen FS, Petersen OB et al.; Danish Fetal Medicine Research Group. Impact of a new national screening policy for Down's syndrome in Denmark: population based cohort study. *BMJ* 2008; 337: a2547
- 5 Kagan KO, Eiben B, Kozłowski P. Kombiniertes Ersttrimesterscreening und zellfreie fetale DNA – „Next Generation Screening“. *Ultraschall Med* 2014; 35: 229–236
- 6 Kagan KO, Hoopmann M, Kozłowski P. Assessment of foetal DNA in maternal blood – a useful tool in the hands of prenatal specialists. *Geburtsh Frauenheilk* 2012; 72: 998–1003
- 7 Gil MM, Akolekar R, Quezada MS et al. Analysis of cell-free DNA in maternal blood in screening for aneuploidies: meta-analysis. *Fetal Diagn Ther* 2014; 35: 156–173
- 8 Statistisches Bundesamt. GeburtenMutterBiologischesAlter.html; Online: <https://www.destatis.de/DE/ZahlenFakten/GesellschaftStaat/Bevoelkerung/Geburten/Tabellen/GeburtenMutterBiologischesAlter.html>; Stand: 25.11.2013
- 9 Cuckle HS, Wald NJ, Thompson SG. Estimating a woman's risk of having a pregnancy associated with Down's syndrome using her age and serum alpha-fetoprotein level. *Br J Obstet Gynaecol* 1987; 94: 387–402
- 10 Snijders RJ, Sundberg K, Holzgreve W et al. Maternal age- and gestation-specific risk for trisomy 21. *Ultrasound Obstet Gynecol* 1999; 13: 167–170
- 11 Willems PJ, Dierckx H, Vandenakker E et al. The first 3,000 Non-Invasive Prenatal Tests (NIPT) with the Harmony test in Belgium and the Netherlands. *Facts Views Vis Obgyn* 2014; 6: 7–12
- 12 Cuckle H, Benn P, Pergament E. Maternal cfDNA screening for Down syndrome – a cost sensitivity analysis. *Prenat Diagn* 2013; 33: 636–642
- 13 Morris S, Karlsen S, Chung N et al. Model-based analysis of costs and outcomes of non-invasive prenatal testing for Down's syndrome using cell free fetal DNA in the UK National Health Service. *PLoS ONE* 2014; 9: e93559
- 14 Beulen L, Grutters JP, Faas BH et al. The consequences of implementing non-invasive prenatal testing in Dutch national health care: a cost-effectiveness analysis. *Eur J Obstet Gynecol* 2014; 182: 53–61
- 15 Song K, Musci TJ, Caughey AB. Clinical utility and cost of non-invasive prenatal testing with cfDNA analysis in high-risk women based on a US population. *J Matern Fetal Neonatal Med* 2013; 26: 1180–1185
- 16 Lütthgens K, Abele H, Alkier R et al. [Cross-validation of the first trimester screening algorithm of the FMF London on 38,700 pregnancies in Germany]. *Ultraschall Med* 2011; 32: 367–372
- 17 Petersen OB, Vogel I, Ekelund C et al.; the Danish Fetal Medicine Study Group; the Danish Clinical Genetics Study Group. Potential diagnostic consequences of applying non-invasive prenatal testing: population-based study from a country with existing first-trimester screening. *Ultrasound Obstet Gynecol* 2014; 43: 265–271
- 18 Kagan KO, Hoopmann M, Hammer R et al. Screening auf Chromosomenstörungen mittels Ersttrimester-Screening und non-invasive prenatal Testing. *Ultraschall Med* 2015; 36: 40–46
